# Supplementary material for: Copper ions-intercalated manganese dioxide self-supporting mesoporous carbon electrode for aqueous zinc-ion batteries
Source: Royal Society of Chemistry journal article supplement (doi:10.1039/d4im00042k), 2024-05-30
Supplement: d4im00042k1.pdf [file d4im00042k1.pdf]

## Copper ions intercalated manganese dioxide self-supporting mesoporous carbon electrode for aqueous zinc-ion batteries

Richeng Jin, Yuan Fang, Beibei Gao, Ying Wan, Yi Zhou, Guofeng Rui, Wei Sun\*, Pengpeng Qiu\* and Wei Luo\*

### Supporting information

#### Synthesis of PEO-*b*-PS diblock copolymer

The PEO-*b*-PS diblock copolymer was obtained by atom transfer radical polymerization (ATRP) method, which consists of a two-step reaction. In the first step, the microinitiator PEO-Br was synthesized through the acyl bromide reaction. 20 g of PEO-5000 was dissolved in 120ml of THF and then 20ml of pyridine was added to obtain a homogeneous solution at 30 °C. Reduce the temperature down to 0 °C with an ice bath, then add 6 g 2-bromoisobutyryl bromide and stir at 30 °C for 24 hours. After adding cold ether, the white precipitation of PEO-Br was collected by centrifugation, washed with cold ether, and dried in vacuum at 30 °C overnight. In the second step, 5g PEO-Br was dissolved in 35 ml of styrene, 0.15g CuBr was added to stir well, and then the bottle was sealed and ventilated with nitrogen for 1h. The mixture was subsequently immersed in an oil bath at 110 °C under stirring. At the same time, add 0.5g PMDETA and react until sticky. Stop the reaction and cool the container to room temperature. After that, add THF to dissolve the sample and filtered through Al<sub>2</sub>O<sub>3</sub> column to remove Cu complex. Next, 200 mL of petroleum ether was poured into the solution to precipitate PEO-*b*-PS block copolymer. The copolymer was then dried in vacuum at 40 °C.

#### Synthesis of mesoporous carbon cloth

Dissolve 60mg of PEO-*b*-PS in 8ml of THF, and then quickly add a mixture of water and ethanol solution (24/12 ml) to obtain a light-blue micelle colloid solution, which presents clear Tyndall effect. After stirring for 5 min, 80 mg of dopamine and Carbon clothes (2X2 cm<sup>2</sup>) were added. Next, sonicating the solution for 10 min, the reaction was initiated by adjusting the pH to 8 using a certain amount of ammonia hydroxide. After reacting for 12h, the as-made sample were washed repeatedly for three times by using water and ethanol, respectively. Finally, the carbon clothes was calcined at 800 °C in N<sub>2</sub> atmosphere.

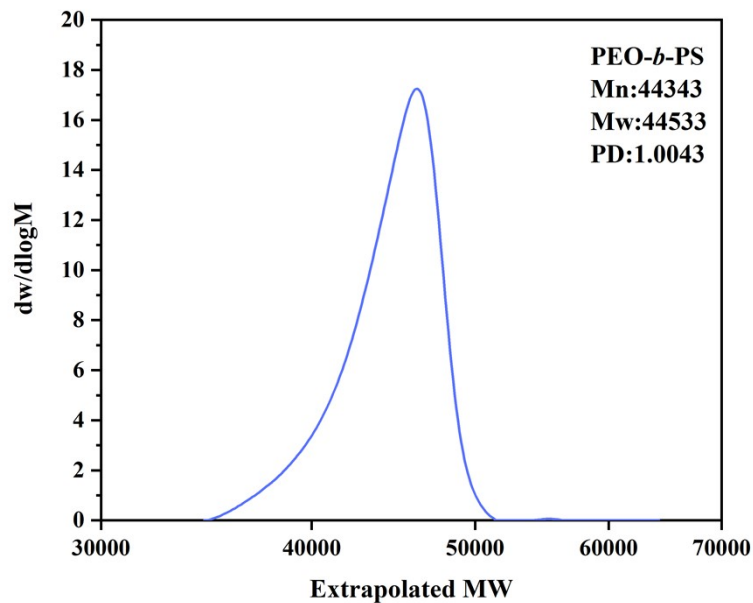

Fig. s1 GPC spectrum of PEO-*b*-PS

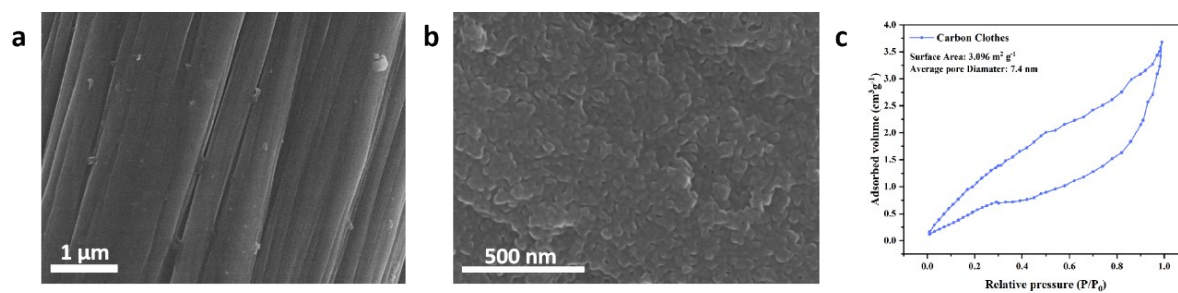

Fig. s2(a) Original carbon cloth scan image, (b) Scanned image of carbon cloth after mesoporous modification, (c) N<sub>2</sub> sorption isotherms and pore size distribution of carbon cloth after mesoporous modification.

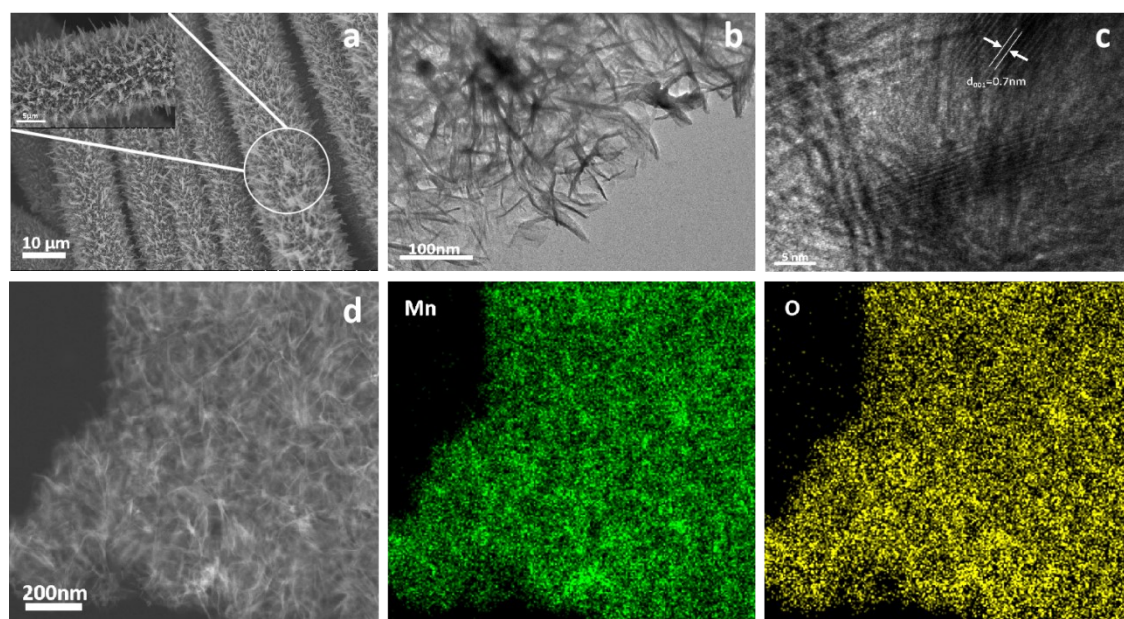

Fig. s3 (a) SEM images, (b) TEM image, (c) HRTEM image, (d) HAADF-STEM image and

corresponding elemental mapping images of Cu-MnO<sub>2</sub>.

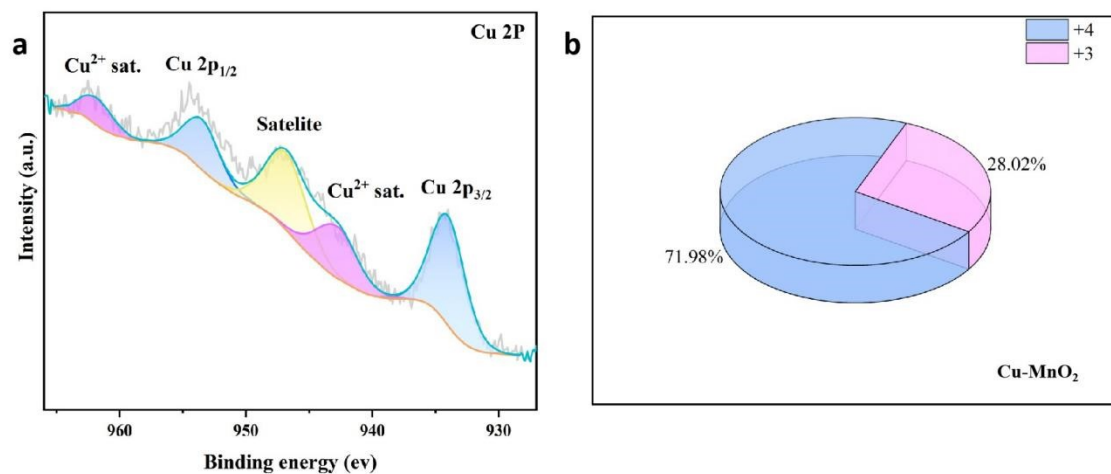

Fig. s4 (a) Cu 2p XPS spectrum, (b) Valence distribution of Mn in Cu-MnO<sub>2</sub>

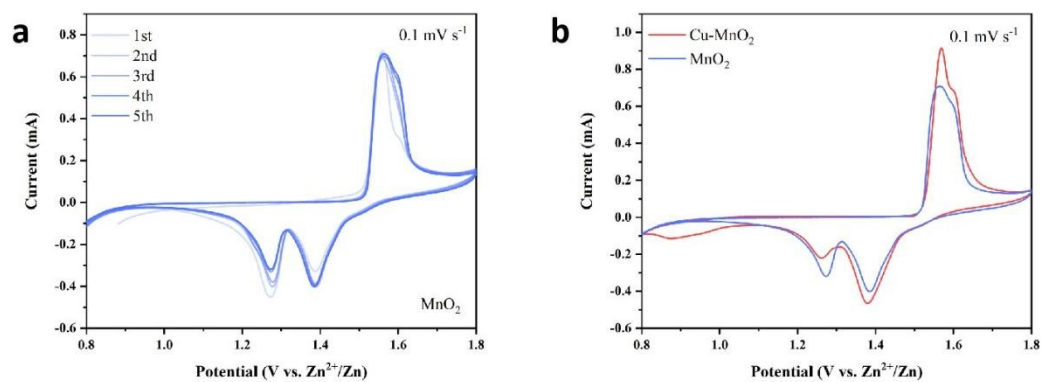

Fig. s5 (a) CV curves at a scan rate of 0.1 mV s<sup>-1</sup>, (b) CV curve comparison at scan rate of 0.1 mV s<sup>-1</sup>

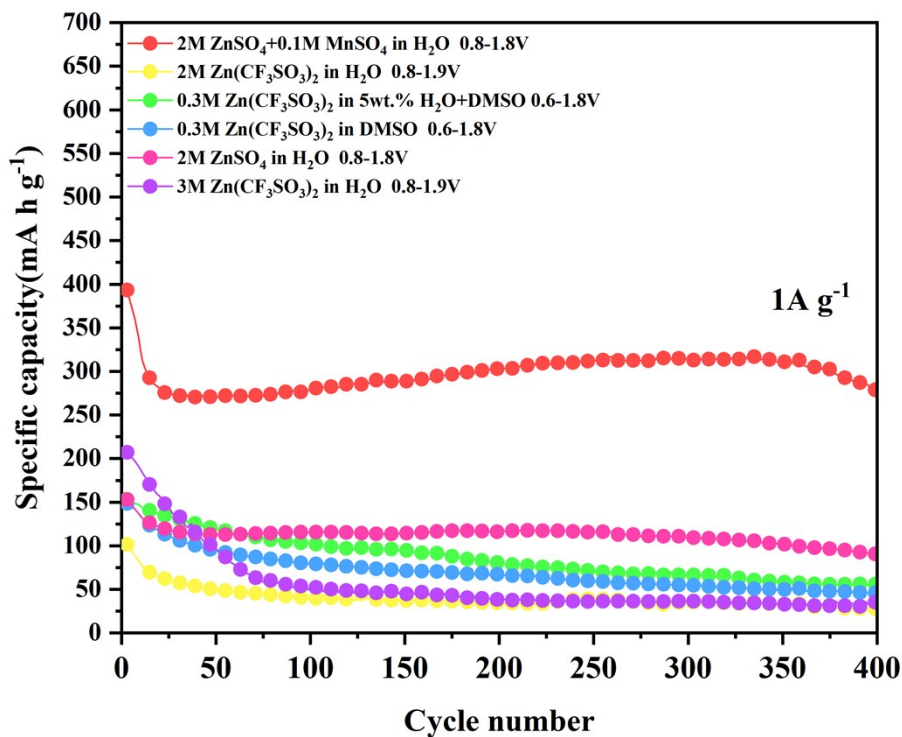

Fig. s6 Electrochemical properties of Cu-MnO<sub>2</sub> in different electrolytes

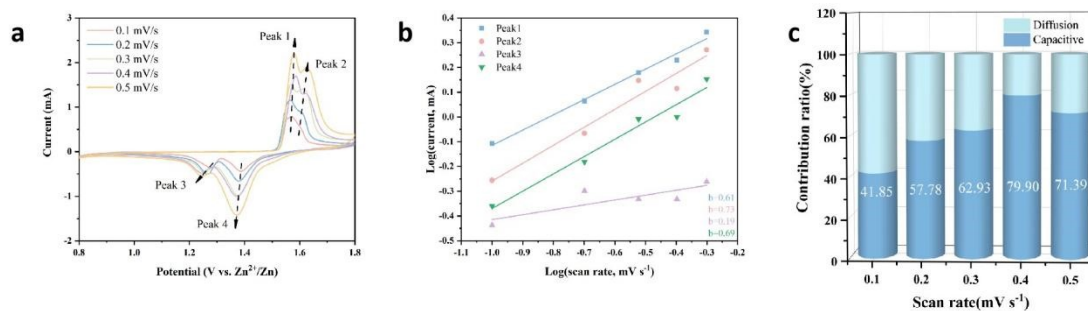

Fig. s7 (a) CV curves at different scan rates, (b) The relationship curves of log *i* versus log *v* plots according to the CV data at selected oxidation/reduction states, (c) Capacitive-controlled ratio at various scan rates of δ-MnO<sub>2</sub>

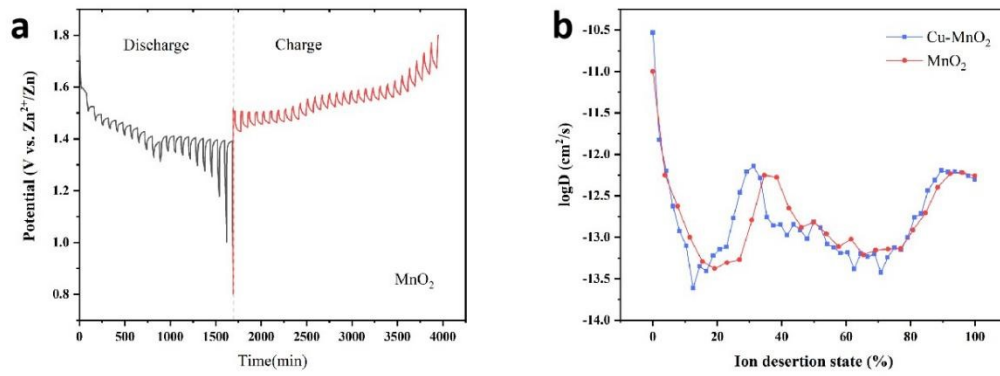

Fig. s8 GITT curves of  $\delta$ -MnO<sub>2</sub>, (e) Diffusion energy barrier values of Cu-MnO<sub>2</sub> and  $\delta$ -MnO<sub>2</sub> at charge

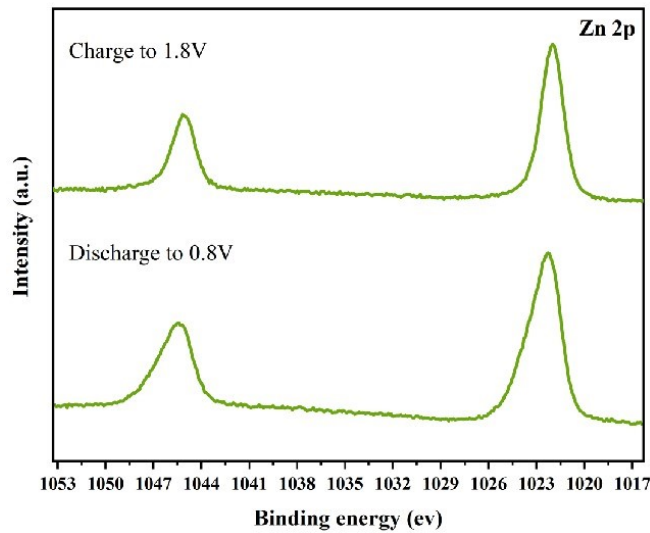

Fig. s9 Zn 2p XPS spectrum of different charging and discharging stages

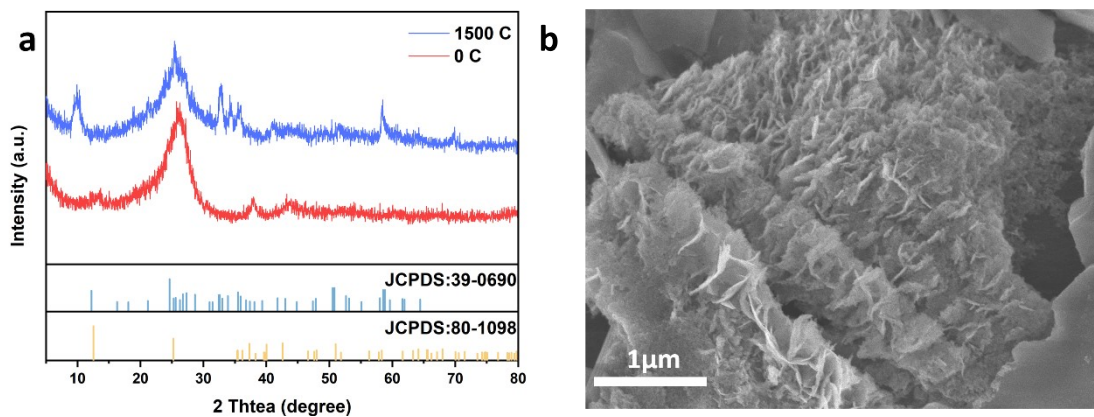

Fig. s10 (a) XRD curves, (b) SEM image after 1500 C

Table.s1 Electrochemical performances fo recently reported cathodes for ZIBs.

| Cathode                                                             | Specific capacity                                                                                            | Cycling stability                                                                                 | electrolyte                                                                                                                                     | Ref.      |
|---------------------------------------------------------------------|--------------------------------------------------------------------------------------------------------------|---------------------------------------------------------------------------------------------------|-------------------------------------------------------------------------------------------------------------------------------------------------|-----------|
| Cu-MnO <sub>2</sub>                                                 | 280 mAh g <sup>-1</sup><br>(1 A g <sup>-1</sup> )                                                            | 200.4 mAh g <sup>-1</sup> at 5 A g <sup>-1</sup> with 57% capacity retention after 1500 cycles    | 2.0 M ZnSO <sub>4</sub> + 0.1 M MnSO <sub>4</sub>                                                                                               | This work |
| δ-<br>K <sub>0.32</sub> MnO <sub>2</sub> · 0.15<br>H <sub>2</sub> O | 373 mAh g <sup>-1</sup><br>(0.03 A g <sup>-1</sup> )<br>218 mAh g <sup>-1</sup><br>(1.54 A g <sup>-1</sup> ) | 173 mAh g <sup>-1</sup> at 3 A g <sup>-1</sup> with 35% capacity retention after 2000cycles       | 2.4 M Zn(CF <sub>3</sub> SO <sub>3</sub> ) <sub>2</sub> + 0.1 M Mn (C <sub>2</sub> F <sub>6</sub> S <sub>2</sub> O <sub>4</sub> N) <sub>2</sub> | 1         |
| MnBi <sub>2</sub> Te <sub>4</sub>                                   | 264.8 mAh g <sup>-1</sup><br>(0.4 A g <sup>-1</sup> )                                                        | 90 mAh g <sup>-1</sup> at 4 A g <sup>-1</sup> with 79.9% capacity retention after 1000 cycles     | PAM/ZnSO <sub>4</sub> hydrogel electrolyte                                                                                                      | 2         |
| Mn@FeHCF                                                            | 166.3 mAh g <sup>-1</sup><br>(0.1 A g <sup>-1</sup> )                                                        | 117 mAh g <sup>-1</sup> at 4 A g <sup>-1</sup> with 72.4% capacity retention after 4800 cycles    | 1 M CF <sub>3</sub> (CF <sub>2</sub> ) <sub>3</sub> SO <sub>3</sub> K + 0.1 M (Zn(CF <sub>3</sub> SO <sub>3</sub> ) <sub>2</sub> )              | 3         |
| MnSe@rGO                                                            | 290 mAh g <sup>-1</sup><br>(0.03 A g <sup>-1</sup> )                                                         | 178 mAh g <sup>-1</sup> at 1.5 A g <sup>-1</sup> with 88.2% capacity retention after 1000 cycles  | 2.0 M ZnSO <sub>4</sub> + 0.1 M MnSO <sub>4</sub>                                                                                               | 4         |
| Zn 0.5Mn <sub>2</sub> O <sub>4</sub>                                | 299.7 mAh g <sup>-1</sup><br>(0.03 A g <sup>-1</sup> )                                                       | 135.5 mAh g <sup>-1</sup> at 3.08 A g <sup>-1</sup> with 90% capacity retention after 1000 cycles | 3 M ZnSO <sub>4</sub> + 0.2 M MnSO <sub>4</sub>                                                                                                 | 5         |
| MON-coated MnO <sub>2</sub>                                         | 273 mAh g <sup>-1</sup><br>(0.2 A g <sup>-1</sup> )                                                          | 82 mAh g <sup>-1</sup> at 10 A g <sup>-1</sup> with 85.9% capacity retention after 1000 cycles    | 2 M ZnSO <sub>4</sub> + 0.2 M MnSO <sub>4</sub>                                                                                                 | 6         |
| VO-OH                                                               | 291 mAh g <sup>-1</sup><br>(1 A g <sup>-1</sup> )                                                            | 213 mAh g <sup>-1</sup> at 5 A g <sup>-1</sup> with 96% capacity retention after 2000 cycles      | 3 M Zn(CF <sub>3</sub> SO <sub>3</sub> ) <sub>2</sub>                                                                                           | 7         |
| Cu-BTA-H                                                            | 105 mAh g <sup>-1</sup><br>(1 A g <sup>-1</sup> )                                                            | 106.1 mAh g <sup>-1</sup> at 2 A g <sup>-1</sup> with 68.5% capacity retention after 500 cycles   | 2.5 M ZnSO <sub>4</sub>                                                                                                                         | 8         |
| δ -MnO <sub>2</sub>                                                 | 123 mAh g <sup>-1</sup><br>(0.0123 A g <sup>-1</sup> )                                                       | 60 mAh g <sup>-1</sup> at 0.0123 A g <sup>-1</sup> with 50% capacity retention after 125 cycles   | 0.5 M AN- Zn(TFSI) <sub>2</sub>                                                                                                                 | 9         |
| α -MnO <sub>2</sub>                                                 | 80 mAh g <sup>-1</sup><br>(0.05 A g <sup>-1</sup> )                                                          | 50 mAh g <sup>-1</sup> at 0.1 A g <sup>-1</sup> with 80% capacity retention after 2050 cycles     | 0.1 M Zn(OTf) <sub>2</sub> in DMSO                                                                                                              | 10        |
| δ -MnO <sub>2</sub>                                                 | 112 mAh g <sup>-1</sup><br>(0.1 A g <sup>-1</sup> )                                                          | 50 mAh g <sup>-1</sup> at 0.5 A g <sup>-1</sup> with 94.4% capacity retention after 1000 cycles   | Zn-NMF+0.1 M MnCl <sub>2</sub>                                                                                                                  | 11        |
| α -MnO <sub>2</sub> /CNT                                            | 275 mAh g <sup>-1</sup><br>(1 A g <sup>-1</sup> )                                                            | 100 mAh g <sup>-1</sup> at 2.7 A g <sup>-1</sup> with 97% capacity                                | PAM-HFP                                                                                                                                         | 12        |

|                                |                                                     |                                                                                                  |                                                 |    |
|--------------------------------|-----------------------------------------------------|--------------------------------------------------------------------------------------------------|-------------------------------------------------|----|
|                                | (0.0616 A g <sup>-1</sup> )                         | retention after 1000 cycles                                                                      |                                                 |    |
| $\delta$ -MnO <sub>2</sub>     | 144 mAh g <sup>-1</sup><br>(0.5 A g <sup>-1</sup> ) | 105mAh g <sup>-1</sup> at 2.7 A g <sup>-1</sup> with 97.14% capacity retention after 1000 cycles | Mn-DMF                                          | 13 |
| Bi- $\alpha$ -MnO <sub>2</sub> | 250 mAh g <sup>-1</sup><br>(1 A g <sup>-1</sup> )   | at 1 A g <sup>-1</sup> with 90.9% capacity retention after 2000 cycles                           | 2 M ZnSO <sub>4</sub> + 0.1 M MnSO <sub>4</sub> | 14 |
| MnBirMO                        | 250 mAh g <sup>-1</sup><br>(0.3 A g <sup>-1</sup> ) | 103mAh g <sup>-1</sup> at 3 A g <sup>-1</sup> with 97% capacity retention after 8000 cycles      | 2 M ZnSO <sub>4</sub>                           | 15 |
| PANI-MnO <sub>2</sub>          | 280 mAh g <sup>-1</sup><br>(0.2 A g <sup>-1</sup> ) |                                                                                                  | 2 M ZnSO <sub>4</sub> + 0.1 M MnSO <sub>4</sub> | 16 |
| C@PODA/MnO <sub>2</sub>        | 192 mAh g <sup>-1</sup><br>(0.5 A g <sup>-1</sup> ) | 137mAh g <sup>-1</sup> at 2 A g <sup>-1</sup> with 89.3% capacity retention after 2000 cycles    | 2 M ZnSO <sub>4</sub> + 0.1 M MnSO <sub>4</sub> | 17 |

## References

- O. Zhanadilov, H. J. Kim, A. Konarov, J. Jeong, J.-H. Park, K. Y. Chung, Z. Bakenov, H. Yashiro and S.-T. Myung, Layered manganese oxide cathode boosting high-capacity and long-term cyclability in aqueous Zinc-Ion batteries, *Energy Storage Mater.*, 2024, **67**, 103283.
- L. Wen, Q. Zhang, J. Shi, F. Wang, S. Wang, Z. Chen, Y. Yue and Y. Gao, Layered Topological Insulator MnBi<sub>2</sub>Te<sub>4</sub> as a Cathode for a High Rate Performance Aqueous Zinc-Ion Battery, *ACS Nano*, 2024, **18**, 5981-5990.
- G. Yang, Z. Liang, Q. Li, Y. Li, F. Tian and C. Wang, Epitaxial Core–Shell MnFe Prussian Blue Cathode for Highly Stable Aqueous Zinc Batteries, *ACS Energy Lett.*, 2023, **8**, 4085-4095.
- S. Wang, G. Zeng, Q. Sun, Y. Feng, X. Wang, X. Ma, J. Li, H. Zhang, J. Wen, J. Feng, L. Ci, A. Cabot and Y. Tian, Flexible Electronic Systems via Electrohydrodynamic Jet Printing: A MnSe@rGO Cathode for Aqueous Zinc-Ion Batteries, *ACS Nano*, 2023, **17**, 13256-13268.
- R. Qin, S. Ding, C. Hou, L. Liu, Y. Wang, W. Zhao, L. Yao, Y. Shao, R. Zou, Q. Zhao, S. Li and F. Pan, Modulating the Proton-Conducting Lanes in Spinel ZnMn<sub>2</sub>O<sub>4</sub> through Off-Stoichiometry, *Adv. Energy Mater.*, 2023, **13**, 2203915.
- Y. Zuo, T. Meng, H. Tian, L. Ling, H. Zhang, H. Zhang, X. Sun and S. Cai, Enhanced H<sup>+</sup> Storage of a MnO<sub>2</sub> Cathode via a MnO<sub>2</sub> Nanolayer Interphase Transformed from Manganese Phosphate, *ACS Nano*, 2023, **17**, 5600-5608.
- Y. Li, S. Zhang, S. Wang, Z. Xiao, F. Meng, Q. Li, X. Zhang, Z. Zhang, L. Zhi and Z. Tang, Layered Structure Regulation for Zinc-Ion Batteries: Rate Capability and Cyclability Enhancement by Rotatable Pillars, *Adv. Energy Mater.*, 2023, **13**, 2203810.
- Z. Sang, J. Liu, X. Zhang, L. Yin, F. Hou and J. Liang, One-Dimensional  $\pi$ -d Conjugated Conductive Metal–Organic Framework with Dual Redox-Active Sites for High-Capacity and Durable Cathodes for Aqueous Zinc Batteries, *ACS Nano*, 2023, **17**, 3077-3087.

9. S.-D. Han, S. Kim, D. Li, V. Petkov, H. D. Yoo, P. J. Phillips, H. Wang, J. J. Kim, K. L. More, B. Key, R. F. Klie, J. Cabana, V. R. Stamenkovic, T. T. Fister, N. M. Markovic, A. K. Burrell, S. Tepavcevic and J. T. Vaughey, Mechanism of Zn Insertion into Nanostructured  $\delta$ -MnO<sub>2</sub>: A Nonaqueous Rechargeable Zn Metal Battery, *Chem. Mater.*, 2017, **29**, 4874-4884.
10. R. D. Corpuz, L. M. De Juan-Corpuz, M. T. Nguyen, T. Yonezawa, H.-L. Wu, A. Somwangthanaroj and S. Kheawhom, Binder-Free  $\alpha$ -MnO<sub>2</sub> Nanowires on Carbon Cloth as Cathode Material for Zinc-Ion Batteries. *Journal*, 2020, **21**.
11. B. Raza, Y. Zhang, J. Chen, U. Shamraiz, Y. Zhang, A. Naveed and J. Wang, High-Current Capable and Non-Flammable Protic Organic Electrolyte for Rechargeable Zn Batteries, *Angew. Chem. Int. Ed.*, 2023, **62**, e202302174.
12. H. Li, C. Han, Y. Huang, Y. Huang, M. Zhu, Z. Pei, Q. Xue, Z. Wang, Z. Liu, Z. Tang, Y. Wang, F. Kang, B. Li and C. Zhi, An extremely safe and wearable solid-state zinc ion battery based on a hierarchical structured polymer electrolyte, *Energy Environ. Sci.*, 2018, **11**, 941-951.
13. B. Raza, A. Naveed, J. chen, H. Lu, T. Rasheed, J. Yang, Y. NuLi and J. Wang, Zn anode sustaining high rate and high loading in organic electrolyte for rechargeable batteries, *Energy Storage Mater.*, 2022, **46**, 523-534.
14. K. Ma, Q. Li, C. Hong, G. Yang and C. Wang, Bi Doping-Enhanced Reversible-Phase Transition of  $\alpha$ -MnO<sub>2</sub> Raising the Cycle Capability of Aqueous Zn–Mn Batteries, *ACS Appl. Mater. Interfaces*, 2021, **13**, 55208-55217.
15. J. Ding, H. Du, G. Cai, S. Huang, C. Peng, L. Wang, J. Luo, X. Wang, M. Xue, X. Zhang, J. Sun and J. Chen, Layer symmetry and interlayer engineering of birnessites towards high-performance rechargeable aqueous Zn-MnO<sub>2</sub> batteries, *Nano Energy*, 2023, **112**, 108485.
16. J. Huang, Z. Wang, M. Hou, X. Dong, Y. Liu, Y. Wang and Y. Xia, Polyaniline-intercalated manganese dioxide nanolayers as a high-performance cathode material for an aqueous zinc-ion battery, *Nat. Commun.*, 2018, **9**, 2906.
17. Y. Zhao, R. Zhou, Z. Song, X. Zhang, T. Zhang, A. Zhou, F. Wu, R. Chen and L. Li, Interfacial Designing of MnO<sub>2</sub> Half-Wrapped by Aromatic Polymers for High-Performance Aqueous Zinc-Ion Batteries, *Angew. Chem. Int. Ed.*, 2022, **61**, e202212231.
